# Supplementary material
Source: Springer Nature journal article supplement (https://www.springermedizin.de/resource/supplementary/12936_2014_3243_MOESM5_ESM.pdf/9545450)

**(Glucuronide M4)**

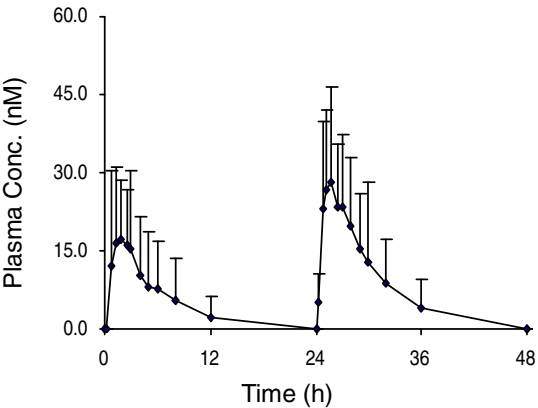

**(Glucuronide M5)**

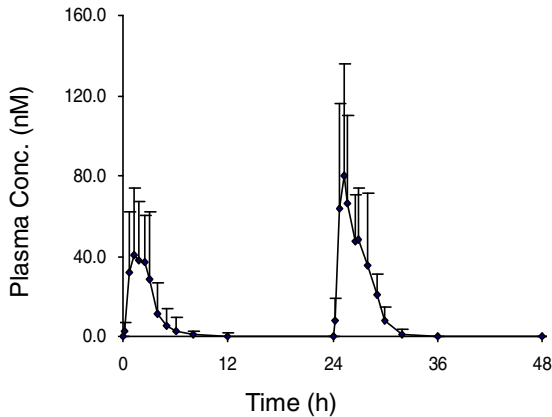

Supplement: MOESM5 [file 9545450]
